# Supplementary material
Source: publisher site journal article supplement (https://www.dovepress.com/get_supplementary_file.php?f=267261-2.xlsx)
Supplement: Supplementary file 1 [file get_supplementary_file.php]

## Sheet: Supplementary raw data
Sex	Age	Educational	Profession	Institution	Occupational	Residence	Contacts	Govt_strategy	Scientist_understanding	Avoid_sneezing	Avoid_gathering	Avoid_touchingbody	wash_hands	Avoid_sick	Avoid_publicplace	stay_home	Avoid_travel	alcohol_disinfectant	Avoid_spitting	wearing_mask	wearing_glove	impact_illness	impact_illness_2	information_frequency	BehaviouralResponse	Cause_org	source_infection	transmission_mode	incubation_period	Clinical_symptoms	Complication	treatment	prevention_handwash	prevention_avoidtouchingface	prevention_avoidovercrowding	wearingmask	wearinggloves	Quarantine_contact	isolation_treatment
1	28	2	1	1	2	1	1	5	1	5	5	5	5	5	5	5	5	5	5	5	5	3	3	5	60	1	1	1	1	1	1	1	1	1	1	1	1	1	1
1	28	2	1	1	2	1	1	5	1	5	5	5	5	5	5	5	5	5	5	5	5	3	3	5	60	1	1	1	1	1	1	1	1	1	1	1	1	1	1
1	28	2	3	5	2	1	1	5	1	5	5	5	5	5	5	5	5	5	5	5	5	3	3	5	29	0	1	1	1	1	0	0	1	1	1	1	1	1	1
1	48	3	3	2	2	1	1	5	3	5	5	4	5	5	5	4	5	5	5	5	5	2	2	5	58	1	1	1	1	1	1	1	1	1	1	1	1	1	1
1	48	3	3	3	2	1	1	5	3	5	5	4	5	5	5	4	5	5	5	5	5	2	2	5	58	1	1	1	1	1	1	1	1	1	1	1	1	1	1
1	26	3	3	1	2	1	1	5	3	5	5	4	5	5	5	4	5	5	5	5	5	2	2	5	29	1	1	1	0	1	1	1	1	1	1	1	1	1	1
2	33	3	2	4	1	1	1	3	5	5	5	5	5	5	4	5	5	5	5	5	2	1	1	5	49	1	1	1	1	1	1	1	1	1	1	1	1	1	1
2	33	3	4	4	1	1	1	3	5	5	5	5	5	5	4	5	5	5	5	5	2	1	1	5	56	1	1	1	1	1	1	1	1	1	1	1	1	1	1
2	33	3	4	5	1	1	1	3	5	5	5	5	5	5	4	5	5	5	5	5	2	1	1	5	56	1	1	1	1	1	1	1	1	1	1	1	1	1	1
1	28	2	1	1	2	1	1	3	5	4	4	5	5	4	3	5	5	5	4	5	3	5	5	5	52	1	1	1	1	1	1	1	1	1	1	1	1	1	1
1	28	2	1	6	2	1	1	3	5	4	4	5	5	4	3	5	5	5	4	5	3	5	5	5	52	1	1	1	1	1	1	1	1	1	1	1	1	1	1
1	28	2	1	4	2	1	1	3	5	4	4	5	5	4	3	5	5	5	4	5	3	5	5	5	49	1	1	1	1	1	1	1	1	1	1	1	1	1	1
1	38	3	4	6	1	1	1	2	1	5	4	3	5	5	5	4	5	5	5	4	2	5	5	5	52	1	1	1	1	1	1	1	1	1	1	1	1	1	1
1	38	3	3	4	1	1	1	2	1	5	4	3	5	5	5	4	5	5	5	4	2	5	5	5	52	1	1	1	1	1	1	1	1	1	1	1	1	1	1
1	38	3	3	4	1	1	1	2	1	5	4	3	5	5	5	4	5	5	5	4	2	5	5	5	45	1	1	1	1	1	1	1	1	1	1	1	1	1	1
1	38	3	3	1	1	1	0	5	2	4	5	4	5	4	3	4	5	4	5	5	3	4	4	5	51	1	1	1	1	1	1	1	1	1	1	1	1	1	1
1	38	3	4	1	1	1	0	5	2	4	5	4	5	4	3	4	5	4	5	5	3	4	4	5	51	1	1	1	1	1	1	1	1	1	1	1	1	1	1
1	38	3	1	6	1	1	0	5	2	4	5	4	5	4	3	4	5	4	5	5	3	4	4	5	32	1	1	1	0	1	1	1	1	1	1	1	1	1	1
1	36	3	4	1	2	1	1	4	3	5	5	5	5	5	5	3	1	5	5	4	2	5	5	4	45	1	1	1	1	1	1	1	1	1	1	1	1	1	1
1	27	3	2	5	1	1	1	4	4	4	5	4	4	4	5	4	5	4	5	3	3	2	2	5	50	1	1	1	1	1	1	1	1	1	1	1	1	1	1
1	27	3	2	1	1	1	1	4	4	4	5	4	4	4	5	4	5	4	5	3	3	2	2	5	50	1	1	1	1	1	1	1	1	1	1	1	1	1	1
1	27	3	2	4	1	1	1	4	4	4	5	4	4	4	5	4	5	4	5	3	3	2	2	5	32	0	0	1	0	0	0	0	1	1	1	1	1	1	1
1	36	3	2	6	2	1	1	4	3	5	5	5	5	5	5	3	1	5	5	4	2	5	5	4	50	1	1	1	1	1	1	1	1	1	1	1	1	1	1
1	36	3	1	2	2	1	1	4	3	5	5	5	5	5	5	3	1	5	5	4	2	5	5	4	50	1	1	1	1	1	1	1	1	1	1	1	1	1	1
2	26	3	4	5	1	1	1	4	3	5	5	2	4	3	5	5	5	5	5	5	1	2	2	5	50	1	1	1	1	1	1	1	1	1	1	1	1	1	1
2	26	3	2	1	1	1	1	4	3	5	5	2	4	3	5	5	5	5	5	5	1	2	2	5	50	1	1	1	1	1	1	1	1	1	1	1	1	1	1
2	26	3	3	2	1	1	1	4	3	5	5	2	4	3	5	5	5	5	5	5	1	2	2	5	30	0	1	1	1	1	0	0	1	1	1	1	1	1	1
1	26	3	2	1	3	1	2	5	2	5	5	4	4	5	3	2	5	4	5	3	3	4	4	5	43	1	1	1	1	1	1	1	1	1	1	1	1	1	1
1	39	3	1	4	1	1	1	5	1	5	5	4	5	5	5	3	5	5	4	2	1	4	4	5	49	1	1	1	1	1	1	1	1	1	1	1	1	1	1
2	24	2	1	4	1	1	1	5	4	5	5	3	4	5	4	4	3	4	5	5	3	5	5	5	50	1	1	1	1	1	1	1	1	1	1	1	1	1	1
2	24	2	1	6	1	1	1	5	4	5	5	3	4	5	4	4	3	4	5	5	3	5	5	5	50	1	1	1	1	1	1	1	1	1	1	1	1	1	1
2	24	2	1	5	1	1	1	5	4	5	5	3	4	5	4	4	3	4	5	5	3	5	5	5	34	0	1	1	1	1	0	0	1	1	1	1	1	1	1
1	31	3	1	3	1	1	1	5	3	5	5	3	5	5	5	4	5	4	4	3	2	1	1	5	50	1	1	1	1	1	1	1	1	1	1	1	1	1	1
1	31	3	1	6	1	1	1	5	3	5	5	3	5	5	5	4	5	4	4	3	2	1	1	5	50	1	1	1	1	1	1	1	1	1	1	1	1	1	1
1	31	3	2	2	1	1	1	5	3	5	5	3	5	5	5	4	5	4	4	3	2	1	1	5	31	1	1	1	0	1	1	1	1	1	1	1	1	1	1
1	28	3	1	6	2	1	1	4	3	5	5	3	4	5	4	4	5	5	5	4	1	2	2	5	47	0	1	1	1	1	1	1	1	1	1	1	1	1	1
1	31	3	1	2	1	1	1	5	3	5	5	3	5	5	5	4	5	4	4	3	2	1	1	5	50	1	1	1	1	1	1	1	1	1	1	1	1	1	1
1	31	3	3	4	1	1	1	5	3	5	5	3	5	5	5	4	5	4	4	3	2	1	1	5	50	1	1	1	1	1	1	1	1	1	1	1	1	1	1
1	31	3	1	6	1	1	1	5	3	5	5	3	5	5	5	4	5	4	4	3	2	1	1	5	34	0	0	1	0	0	0	0	1	1	1	1	1	1	1
1	39	3	2	5	1	1	1	5	1	5	5	4	5	5	5	3	5	5	4	2	1	4	4	5	49	1	1	1	1	1	1	1	1	1	1	1	1	1	1
1	39	3	1	6	1	1	1	5	1	5	5	4	5	5	5	3	5	5	4	2	1	4	4	5	49	1	1	1	1	1	1	1	1	1	1	1	1	1	1
1	31	3	3	4	1	1	1	5	3	5	5	3	5	5	5	4	5	4	4	3	2	1	1	5	50	1	1	1	1	1	1	1	1	1	1	1	1	1	1
1	28	3	2	1	2	1	1	4	3	5	5	3	4	5	4	4	5	5	5	4	1	2	2	5	50	1	1	1	1	1	1	1	1	1	1	1	1	1	1
1	31	3	2	1	1	1	1	5	3	5	5	3	5	5	5	4	5	4	4	3	2	1	1	5	50	1	1	1	1	1	1	1	1	1	1	1	1	1	1
1	28	3	1	3	2	1	1	4	3	5	5	3	4	5	4	4	5	5	5	4	1	2	2	5	50	1	1	1	1	1	1	1	1	1	1	1	1	1	1
1	26	3	2	1	3	1	2	5	2	5	5	4	4	5	3	2	5	4	5	3	3	4	4	5	48	1	1	1	1	1	1	1	1	1	1	1	1	1	1
1	26	3	1	3	3	1	2	5	2	5	5	4	4	5	3	2	5	4	5	3	3	4	4	5	48	1	1	1	1	0	1	1	1	1	1	1	1	1	1
1	31	3	2	1	1	1	1	5	3	5	5	3	5	5	5	4	5	4	4	3	2	1	1	5	32	0	1	1	1	1	0	0	1	1	1	1	1	1	1
1	29	3	1	3	2	1	1	5	4	4	5	4	5	5	2	1	5	5	5	3	2	5	5	5	46	1	1	1	1	1	1	1	1	1	1	1	1	1	1
1	29	3	1	1	2	1	1	5	4	4	5	4	5	5	2	1	5	5	5	3	2	5	5	5	46	1	1	1	1	1	1	1	1	1	1	1	1	1	1
1	29	3	1	4	2	1	1	5	4	4	5	4	5	5	2	1	5	5	5	3	2	5	5	5	31	0	0	1	0	0	0	0	1	1	1	1	1	1	1
1	23	2	1	4	2	1	1	3	1	5	4	2	5	5	1	1	5	5	3	5	5	5	5	5	43	1	1	1	1	1	1	1	1	1	1	1	1	1	1
1	23	2	1	6	2	1	1	3	1	5	4	2	5	5	1	1	5	5	3	5	5	5	5	5	46	1	1	1	1	1	1	1	1	1	1	1	1	1	1
1	23	2	3	3	2	1	1	3	1	5	4	2	5	5	1	1	5	5	3	5	5	5	5	5	46	1	1	1	1	1	1	1	1	1	1	1	1	1	1
1	30	4	4	1	2	1	1	1	3	4	5	4	5	5	5	1	2	5	4	3	3	3	3	5	47	0	1	1	1	1	1	1	1	1	1	1	1	1	1
1	30	4	4	5	2	1	1	1	3	4	5	4	5	5	5	1	2	5	4	3	3	3	3	5	46	1	1	1	1	1	1	1	1	1	1	1	1	1	1
1	30	4	3	2	2	1	1	1	3	4	5	4	5	5	5	1	2	5	4	3	3	3	3	5	46	1	1	1	1	1	1	1	1	1	1	1	1	1	1
1	26	2	1	3	1	1	1	5	1	5	4	3	5	5	3	2	5	5	4	3	2	2	2	5	43	1	1	1	1	1	1	1	1	1	1	1	1	1	1
1	32	3	4	1	2	1	1	2	2	5	4	4	4	5	4	3	4	5	5	3	1	3	3	4	49	1	1	1	1	1	1	1	1	1	1	1	1	1	1
1	26	2	2	6	1	1	1	5	1	5	4	3	5	5	3	2	5	5	4	3	2	2	2	5	46	1	1	1	1	1	1	1	1	1	1	1	1	1	1
1	26	2	1	4	1	1	1	5	1	5	4	3	5	5	3	2	5	5	4	3	2	2	2	5	34	1	1	1	0	1	1	1	1	1	1	1	1	1	1
2	25	2	1	4	1	1	1	5	4	5	5	3	5	4	4	5	3	5	5	3	1	2	2	5	48	1	1	1	1	0	1	1	1	1	1	1	1	1	1
2	25	2	1	5	1	1	1	5	4	5	5	3	5	4	4	5	3	5	5	3	1	2	2	5	48	1	1	1	1	0	1	1	1	1	1	1	1	1	1
2	25	2	2	6	1	1	1	5	4	5	5	3	5	4	4	5	3	5	5	3	1	2	2	5	48	1	1	1	1	0	1	1	1	1	1	1	1	1	1
1	32	3	1	6	2	1	1	2	2	5	4	4	4	5	4	3	4	5	5	3	1	3	3	4	47	1	1	1	1	1	1	1	1	1	1	1	1	1	1
1	32	3	1	2	2	1	1	2	2	5	4	4	4	5	4	3	4	5	5	3	1	3	3	4	47	1	1	1	1	1	1	1	1	1	1	1	1	1	1
1	32	3	2	4	1	1	1	4	2	4	4	3	5	4	5	4	4	4	4	3	3	2	2	5	47	0	1	1	1	1	1	1	1	1	1	1	1	1	1
1	32	3	2	1	1	1	1	4	2	4	4	3	5	4	5	4	4	4	4	3	3	2	2	5	47	1	1	1	1	1	1	1	1	1	1	1	1	1	1
1	32	3	3	1	1	1	1	4	2	4	4	3	5	4	5	4	4	4	4	3	3	2	2	5	34	1	1	1	0	1	1	1	1	1	1	1	1	1	1
1	24	2	1	1	2	1	1	3	1	5	4	4	5	5	1	1	2	5	3	5	4	5	5	5	49	1	1	1	1	1	1	1	1	1	1	1	1	1	1
1	28	2	2	6	2	1	1	4	1	5	5	3	4	3	2	2	5	4	5	2	3	1	1	5	43	1	1	1	1	1	1	1	1	1	1	1	1	1	1
1	24	2	3	1	3	1	1	3	2	4	4	4	5	5	3	5	5	4	5	3	1	4	5	5	45	1	1	1	1	1	1	1	1	1	1	1	1	1	1
1	24	2	1	1	3	1	1	3	2	4	4	4	5	5	3	5	5	4	5	3	1	4	5	5	48	1	1	1	1	1	1	1	1	1	1	1	1	1	1
1	24	2	3	2	3	1	1	3	2	4	4	4	5	5	3	5	5	4	5	3	1	4	5	5	48	1	1	1	1	0	1	0	1	1	1	1	1	1	1
1	24	2	1	6	2	1	1	3	1	5	4	4	5	5	1	1	2	5	3	5	4	5	5	5	44	1	1	1	1	1	1	1	1	1	1	1	1	1	1
1	24	2	4	1	2	1	1	3	1	5	4	4	5	5	1	1	2	5	3	5	4	5	5	5	44	1	1	1	1	1	1	1	1	1	1	1	1	1	1
1	28	2	3	1	2	1	1	4	1	5	5	3	4	3	2	2	5	4	5	2	3	1	1	5	43	1	1	1	1	1	1	1	1	1	1	1	1	1	1
1	28	2	2	1	2	1	1	4	1	5	5	3	4	3	2	2	5	4	5	2	3	1	1	5	43	1	1	1	1	1	1	1	1	1	1	1	1	1	1
1	40	2	1	1	1	1	1	5	4	3	4	3	4	4	4	5	5	5	4	4	2	3	3	5	47	0	1	1	1	1	1	1	1	1	1	1	1	1	1
1	40	2	1	1	1	1	1	5	4	3	4	3	4	4	4	5	5	5	4	4	2	3	3	5	47	0	1	1	1	1	1	1	1	1	1	1	1	1	1
1	40	2	2	5	1	1	1	5	4	3	4	3	4	4	4	5	5	5	4	4	2	3	3	5	34	0	1	1	1	1	0	0	1	1	1	1	1	1	1
1	31	2	1	2	1	2	1	4	2	4	5	2	5	4	4	5	5	5	3	2	2	5	5	5	43	1	1	1	1	1	1	1	1	1	1	1	1	1	1
1	31	2	3	4	1	2	1	4	2	4	5	2	5	4	4	5	5	5	3	2	2	5	5	5	45	1	1	1	1	1	1	1	1	1	1	1	1	1	1
1	31	2	1	1	1	2	1	4	2	4	5	2	5	4	4	5	5	5	3	2	2	5	5	5	46	1	1	1	1	1	1	1	1	1	1	1	1	1	1
1	31	2	4	4	1	2	1	4	2	4	5	2	5	4	4	5	5	5	3	2	2	5	5	5	46	1	1	1	1	1	1	1	1	1	1	1	1	1	1
1	31	2	2	4	1	2	1	4	2	4	5	2	5	4	4	5	5	5	3	2	2	5	5	5	46	1	1	1	1	1	1	1	1	1	1	1	1	1	1
1	31	2	4	5	1	2	1	4	2	4	5	2	5	4	4	5	5	5	3	2	2	5	5	5	46	1	1	1	1	1	1	1	1	1	1	1	1	1	1
1	32	3	2	6	1	1	1	3	2	5	4	4	3	4	4	4	5	5	5	1	1	1	1	5	45	1	1	1	1	1	1	1	1	1	1	1	1	1	1
1	32	3	2	1	1	1	1	3	2	5	4	4	3	4	4	4	5	5	5	1	1	1	1	5	45	1	1	1	1	1	1	1	1	1	1	1	1	1	1
1	28	3	1	4	1	1	1	3	3	5	5	4	4	4	4	3	5	5	3	1	1	3	3	4	44	1	1	1	1	1	1	1	1	1	1	1	1	1	1
1	28	3	1	4	1	1	1	3	3	5	5	4	4	4	4	3	5	5	3	1	1	3	3	4	44	1	1	1	1	1	1	1	1	1	1	1	1	1	1
1	28	3	1	2	1	1	1	3	3	5	5	4	4	4	4	3	5	5	3	1	1	3	3	4	44	1	1	1	1	1	1	1	1	1	1	1	1	1	1
1	32	3	4	4	1	1	1	3	2	5	4	4	3	4	4	4	5	5	5	1	1	1	1	5	47	1	1	1	1	0	1	1	1	1	1	1	1	1	1
1	33	3	1	4	2	1	1	3	4	5	5	2	5	5	4	1	5	4	4	2	1	2	2	5	43	1	1	1	1	1	1	1	1	1	1	1	1	1	1
1	33	3	2	4	2	1	1	3	4	5	5	2	5	5	4	1	5	4	4	2	1	2	2	5	43	1	1	1	1	1	1	1	1	1	1	1	1	1	1
1	33	3	3	3	2	1	1	3	4	5	5	2	5	5	4	1	5	4	4	2	1	2	2	5	34	0	0	1	0	0	0	0	1	1	1	1	1	1	1
1	34	3	1	1	1	1	1	4	5	5	5	2	4	5	5	5	4	4	3	3	1	2	2	5	43	1	1	1	1	1	1	1	1	1	1	1	1	1	1
1	36	3	1	3	2	1	1	5	3	4	5	3	4	4	3	4	4	5	3	4	1	2	2	5	49	1	1	1	1	1	1	1	1	1	1	1	1	1	1
1	29	2	1	3	2	1	1	3	3	4	4	3	4	4	3	2	4	4	4	2	4	4	4	4	42	1	1	1	1	1	1	1	1	1	1	1	1	1	1
1	29	2	1	5	2	1	1	3	3	4	4	3	4	4	3	2	4	4	4	2	4	4	4	4	42	1	1	1	1	1	1	1	1	1	1	1	1	1	1
1	28	3	2	5	1	1	1	3	3	5	5	4	4	4	3	3	5	5	3	1	1	3	3	5	43	1	1	1	1	1	1	1	1	1	1	1	1	1	1
1	28	3	1	6	1	1	1	3	3	5	5	4	4	4	3	3	5	5	3	1	1	3	3	5	43	1	1	1	1	1	1	1	1	1	1	1	1	1	1
1	28	3	3	2	1	1	1	3	3	5	5	4	4	4	3	3	5	5	3	1	1	3	3	5	43	1	1	1	1	1	1	1	1	1	1	1	1	1	1
1	29	2	2	1	2	1	1	3	3	4	4	3	4	4	3	2	4	4	4	2	4	4	4	4	47	1	1	1	1	0	1	1	1	1	1	1	1	1	1
2	25	2	1	6	1	1	1	4	1	4	5	1	5	4	3	5	5	3	5	4	1	3	3	5	45	1	1	1	1	1	1	1	1	1	1	1	1	1	1
2	25	2	2	1	1	1	1	4	1	4	5	1	5	4	3	5	5	3	5	4	1	3	3	5	45	1	1	1	1	1	1	1	1	1	1	1	1	1	1
1	36	3	2	1	2	1	1	5	3	4	5	3	4	4	3	4	4	5	3	4	1	2	2	5	44	1	1	1	1	1	1	1	1	1	1	1	1	1	1
1	36	3	4	1	2	1	1	5	3	4	5	3	4	4	3	4	4	5	3	4	1	2	2	5	44	1	1	1	1	1	1	1	1	1	1	1	1	1	1
2	25	2	2	5	1	1	1	4	1	4	5	1	5	4	3	5	5	3	5	4	1	3	3	5	32	1	1	1	0	1	1	1	1	1	1	1	1	1	1
1	34	3	1	4	1	1	1	4	5	5	5	2	4	5	5	5	4	4	3	3	1	2	2	5	46	1	1	1	1	1	1	1	1	1	1	1	1	1	1
1	34	3	1	1	1	1	1	4	5	5	5	2	4	5	5	5	4	4	3	3	1	2	2	5	46	1	1	1	1	1	1	1	1	1	1	1	1	1	1
1	34	3	1	1	1	1	1	5	4	4	2	4	5	4	2	1	1	5	5	4	3	4	4	5	45	1	1	1	1	1	1	1	1	1	1	1	1	1	1
1	34	3	3	4	2	1	1	2	2	4	4	3	5	4	4	1	2	5	4	3	1	3	3	5	45	1	1	1	1	1	1	1	1	1	1	1	1	1	1
1	33	3	3	6	1	1	1	2	3	2	5	3	4	5	5	3	3	5	5	2	1	2	2	4	49	1	1	1	1	1	1	1	1	1	1	1	1	1	1
1	48	4	4	5	1	1	1	3	3	4	4	4	4	4	4	5	4	4	2	1	4	4	5	5	44	1	1	1	1	1	1	1	1	1	1	1	1	1	1
1	48	4	3	6	1	1	1	3	3	4	4	4	4	4	4	5	4	4	2	1	4	4	5	5	44	1	1	1	1	1	1	1	1	1	1	1	1	1	1
1	32	4	1	3	1	1	1	3	3	4	4	4	4	4	4	5	4	4	2	1	4	4	5	5	44	1	1	1	1	1	1	1	1	1	1	1	1	1	1
1	34	3	1	2	2	1	1	2	2	4	4	3	5	4	4	1	2	5	4	3	1	3	3	5	40	1	1	1	1	1	1	1	1	1	1	1	1	1	1
1	34	3	2	4	2	1	1	2	2	4	4	3	5	4	4	1	2	5	4	3	1	3	3	5	40	1	1	1	1	1	1	1	1	1	1	1	1	1	1
1	34	3	1	6	2	1	1	2	2	4	4	3	5	4	4	1	2	5	4	3	1	3	3	5	47	1	1	1	1	0	1	1	1	1	1	1	1	1	1
1	34	3	1	3	2	1	1	2	2	4	4	3	5	4	4	1	2	5	4	3	1	3	3	5	40	1	1	1	1	1	1	1	1	1	1	1	1	1	1
1	34	3	2	6	2	1	1	2	2	4	4	3	5	4	4	1	2	5	4	3	1	3	3	5	40	1	1	1	1	1	1	1	1	1	1	1	1	1	1
1	34	3	1	1	1	1	1	5	4	4	2	4	5	4	2	1	1	5	5	4	3	4	4	5	40	1	1	1	1	1	1	1	1	1	1	1	1	1	1
1	34	3	1	6	1	1	1	5	4	4	2	4	5	4	2	1	1	5	5	4	3	4	4	5	40	1	1	1	1	1	1	1	1	1	1	1	1	1	1
2	27	3	2	1	1	1	1	5	3	5	4	4	4	5	4	5	4	2	5	2	1	2	2	5	45	1	1	1	1	1	1	1	1	1	1	1	1	1	1
2	27	3	1	2	1	1	1	5	3	5	4	4	4	5	4	5	4	2	5	2	1	2	2	5	45	1	1	1	1	1	1	1	1	1	1	1	1	1	1
2	27	3	1	3	1	1	1	5	3	5	4	4	4	5	4	5	4	2	5	2	1	2	2	5	45	1	1	1	1	1	1	1	1	1	1	1	1	1	1
1	33	3	1	6	1	1	1	2	3	2	5	3	4	5	5	3	3	5	5	2	1	2	2	4	43	1	1	1	1	1	1	1	1	1	1	1	1	1	1
1	33	3	1	1	1	1	1	2	3	2	5	3	4	5	5	3	3	5	5	2	1	2	2	4	43	1	1	1	1	1	1	1	1	1	1	1	1	1	1
1	28	3	4	2	1	1	1	3	3	5	5	4	4	4	4	3	3	4	2	2	1	2	2	5	41	1	1	1	1	1	1	1	1	1	1	1	1	1	1
1	28	3	2	4	1	1	1	3	3	5	5	4	4	4	4	3	3	4	2	2	1	2	2	5	41	1	1	1	1	1	1	1	1	1	1	1	1	1	1
1	28	3	2	5	1	1	1	3	3	5	5	4	4	4	4	3	3	4	2	2	1	2	2	5	47	0	1	1	1	1	1	1	1	1	1	1	1	1	1
1	43	4	4	1	1	1	2		4	4	5	3	4	3	5	4	5	1	3	2	1	2	1	4	49	1	1	1	1	1	1	1	1	1	1	1	1	1	1
1	24	3	3	5	3	1	1	3	4	4	2	2	2	2	2	1	5	4	4	4	4	2	2	3	49	1	1	1	1	1	1	1	1	1	1	1	1	1	1
1	28	2	2	6	2	1	1	5	5	2	3	4	4	4	4	4	4	2	3	4	3	5	5	4	49	1	1	1	1	1	1	1	1	1	1	1	1	1	1
1	37	3	1	6	1	1	1	4	2	4	4	3	4	5	2	3	4	4	4	3	1	5	5	5	45	1	1	1	1	1	1	1	1	1	1	1	1	1	1
1	28	2	1	6	2	1	1	5	5	2	3	4	4	4	4	4	4	2	3	4	3	5	5	4	41	1	1	1	1	1	1	1	1	1	1	1	1	1	1
1	28	2	2	5	2	1	1	5	5	2	3	4	4	4	4	4	4	2	3	4	3	5	5	4	41	1	1	1	1	1	1	1	1	1	1	1	1	1	1
1	30	3	1	4	1	1	1	5	3	5	2	1	5	5	4	1	5	4	5	1	1	5	5	5	49	1	1	1	1	1	1	1	1	1	1	1	1	1	1
1	36	2	2	1	1	1	1	3	3	2	5	1	4	5	4	4	5	4	4	2	2	5	5	5	49	1	1	1	1	1	1	1	1	1	1	1	1	1	1
1	28	3	1	2	1	1	1	4	3	5	5	3	3	4	4	3	5	3	1	2	2	3	3	5	49	1	1	1	1	1	1	1	1	1	1	1	1	1	1
1	36	2	1	4	1	1	1	3	3	2	5	1	4	5	4	4	5	4	4	2	2	5	5	5	42	1	1	1	1	1	1	1	1	1	1	1	1	1	1
1	36	2	2	6	1	1	1	3	3	2	5	1	4	5	4	4	5	4	4	2	2	5	5	5	42	1	1	1	1	1	1	1	1	1	1	1	1	1	1
1	28	2	2	1	2	1	1	5	5	2	3	4	4	4	4	4	4	2	3	4	3	5	5	4	41	1	1	1	1	1	1	1	1	1	1	1	1	1	1
1	28	2	1	6	2	1	1	5	5	2	3	4	4	4	4	4	4	2	3	4	3	5	5	4	41	1	1	1	1	1	1	1	1	1	1	1	1	1	1
1	37	3	4	4	1	1	1	4	2	4	4	3	4	5	2	3	4	4	4	3	1	5	5	5	41	1	1	1	1	1	1	1	1	1	1	1	1	1	1
1	37	3	2	4	1	1	1	4	2	4	4	3	4	5	2	3	4	4	4	3	1	5	5	5	41	1	1	1	1	1	1	1	1	1	1	1	1	1	1
1	28	3	1	4	1	1	1	4	3	5	5	3	3	4	4	3	5	3	1	2	2	3	3	5	40	1	1	1	1	1	1	1	1	1	1	1	1	1	1
1	28	3	1	1	1	1	1	4	3	5	5	3	3	4	4	3	5	3	1	2	2	3	3	5	40	0	1	1	1	1	1	1	1	1	1	1	1	1	1
1	30	3	4	4	1	1	1	5	3	5	2	1	5	5	4	1	5	4	5	1	1	5	5	5	39	0	1	1	1	1	1	1	1	1	1	1	1	1	1
1	30	3	3	4	1	1	1	5	3	5	2	1	5	5	4	1	5	4	5	1	1	5	5	5	39	0	1	1	1	1	1	1	1	1	1	1	1	1	1
1	31	3	2	1	3	1	1	2	4	5	3	2	4	5	3	3	5	5	4	1	1	4	4	5	41	1	1	1	1	1	1	1	1	1	1	1	1	1	1
1	31	3	1	3	3	1	1	2	4	5	3	2	4	5	3	3	5	5	4	1	1	4	4	5	41	1	1	1	1	1	1	1	1	1	1	1	1	1	1
1	31	3	3	1	3	1	1	2	4	5	3	2	4	5	3	3	5	5	4	1	1	4	4	5	30	1	1	1	0	1	1	1	1	1	1	1	1	1	1
1	28	2	1	3	2	1	1	5	5	2	3	4	4	4	4	4	4	2	3	4	3	5	5	4	47	0	1	1	1	1	1	1	1	1	1	1	1	1	1
1	43	4	2	1	1	1	2		4	4	5	3	4	3	5	4	5	1	3	2	1	2	1	4	40	1	1	1	1	1	1	1	1	1	1	1	1	1	1
1	43	4	1	1	1	1	2		4	4	5	3	4	3	5	4	5	1	3	2	1	2	1	4	40	1	1	1	1	1	1	1	1	1	1	1	1	1	1
1	24	3	1	4	3	1	1	3	4	4	2	2	2	2	2	1	5	4	4	4	4	2	2	3	36	0	0	1	1	1	1	1	1	1	1	1	1	1	1
1	24	3	1	6	3	1	1	3	4	4	2	2	2	2	2	1	5	4	4	4	4	2	2	3	36	1	1	0	1	1	1	1	1	1	1	1	1	1	1
1	48	3	3	6	1	1	1	1	2	5	5	2	4	4	2	3	5	4	3	1	1	1	1	5	49	1	1	1	1	1	1	1	1	1	1	1	1	1	1
1	29	3	3	1	1	1	1	3	2	5	4	4	3	5	3	4	4	4	3	1	1	4	4	5	49	1	1	1	1	1	1	1	1	1	1	1	1	1	1
1	33	3	3	5	1	1	1	3	4	5	5	1	5	4	2	3	3	4	3	3	1	3	3	4	43	1	1	1	1	1	1	1	1	1	1	1	1	1	1
1	33	3	3	3	1	1	1	3	4	5	5	1	5	4	2	3	3	4	3	3	1	3	3	4	39	0	1	1	1	1	1	1	1	1	1	1	1	1	1
1	33	3	1	1	1	1	1	3	4	5	5	1	5	4	2	3	3	4	3	3	1	3	3	4	39	0	1	1	1	1	1	1	1	1	1	1	1	1	1
1	48	3	3	2	1	1	1	1	2	5	5	2	4	4	2	3	5	4	3	1	1	1	1	5	39	0	1	1	1	1	1	1	1	1	1	1	1	1	1
1	48	3	4	6	1	1	1	1	2	5	5	2	4	4	2	3	5	4	3	1	1	1	1	5	39	0	1	1	1	1	1	1	1	1	1	1	1	1	1
1	32	3	4	1	1	1	1	3	2	4	5	2	4	4	5	2	5	1	4	1	1	4	4	4	38	0	1	1	1	1	1	1	1	1	1	1	1	1	1
1	32	3	2	5	1	1	1	3	2	4	5	2	4	4	5	2	5	1	4	1	1	4	4	4	38	1	1	1	1	1	1	1	1	1	1	1	1	1	1
1	32	3	1	1	1	1	1	3	2	4	5	2	4	4	5	2	5	1	4	1	1	4	4	4	31	0	0	1	0	0	0	0	1	1	1	1	1	1	1
1	43	3	2	1	1	1	2	4	3	4	4	4	4	4	4	4	5	1	2	3	1	3	3	4	47	1	1	1	1	0	1	1	1	1	1	1	1	1	1
1	27	2	2	4	2	1	1	5	4	4	3	3	3	3	3	3	4	4	3	3	2	3	3	5	47	0	1	1	1	1	1	1	1	1	1	1	1	1	1
1	29	3	4	1	1	1	1	3	2	5	4	4	3	5	3	4	4	4	3	1	1	4	4	5	41	1	1	1	1	1	1	1	1	1	1	1	1	1	1
1	29	3	1	1	1	1	1	3	2	5	4	4	3	5	3	4	4	4	3	1	1	4	4	5	41	1	1	1	1	1	1	1	1	1	1	1	1	1	1
1	30	3	1	6	1	1	2	4	3	4	4	4	4	4	4	4	5	1	2	3	1	3	3	4	40	1	1	1	1	1	1	1	1	1	1	1	1	1	1
1	30	3	4	5	1	1	2	4	3	4	4	4	4	4	4	4	5	1	2	3	1	3	3	4	40	1	1	1	1	1	1	1	1	1	1	1	1	1	1
1	25	2	1	2	2	1	1	5	4	4	3	3	3	3	3	3	4	4	3	3	2	3	3	5	38	0	1	1	1	1	1	1	1	1	1	1	1	1	1
1	25	2	2	6	2	1	1	5	4	4	3	3	3	3	3	3	4	4	3	3	2	3	3	5	38	1	1	1	0	1	1	1	1	1	1	1	1	1	1
1	34	2	1	3	2	1	1	2	3	3	1	2	4	2	2	1	4	4	3	4	4	2	2	4	49	1	1	1	1	1	1	1	1	1	1	1	1	1	1
1	34	3	1	4	2	1	1	2	2	3	3	3	4	1	3	1	1	4	5	3	2	3	3	5	43	1	1	1	1	1	1	1	1	1	1	1	1	1	1
1	32	3	3	1	1	1	1	3	1	5	5	4	4	5	1	2	4	3	3	1	1	2	2	4	43	1	1	1	1	1	1	1	1	1	1	1	1	1	1
1	36	3	2	1	2	1	1	2	2	3	3	3	4	1	3	1	1	4	5	3	2	3	3	5	33	1	1	1	0	1	1	1	1	1	1	1	1	1	1
1	36	3	2	1	2	1	1	2	2	3	3	3	4	1	3	1	1	4	5	3	2	3	3	5	33	0	1	1	1	1	0	0	1	1	1	1	1	1	1
1	25	3	1	1	1	1	1	4	3	4	5	3	4	4	4	4	5	2	2	1	1	3	3	2	39	0	1	1	1	1	1	1	1	1	1	1	1	1	1
1	25	3	4	5	1	1	1	4	3	4	5	3	4	4	4	4	5	2	2	1	1	3	3	2	39	0	1	1	1	1	1	1	1	1	1	1	1	1	1
1	25	3	1	6	1	1	1	4	3	4	5	3	4	4	4	4	5	2	2	1	1	3	3	2	39	0	1	1	1	1	1	1	1	1	1	1	1	1	1
1	30	3	3	1	1	1	1	3	3	5	4	3	4	3	1	4	4	4	4	1	1	3	3	5	38	0	1	1	1	1	1	1	1	1	1	1	1	1	1
1	30	3	3	4	1	1	1	3	3	5	4	3	4	3	1	4	4	4	4	1	1	3	3	5	38	0	1	1	1	1	1	1	1	1	1	1	1	1	1
1	29	2	1	4	2	1	1	2	3	3	1	2	4	2	2	1	4	4	3	4	4	2	2	4	34	1	1	1	0	1	1	1	1	1	1	1	1	1	1
1	29	2	1	3	2	1	1	2	3	3	1	2	4	2	2	1	4	4	3	4	4	2	2	4	34	0	0	1	0	0	0	0	1	1	1	1	1	1	1
1	30	3	1	4	1	1	1	3	3	5	4	3	4	3	1	4	4	4	4	1	1	3	3	5	32	0	0	1	0	0	0	0	1	1	1	1	1	1	1
1	32	3	1	3	1	1	1	3	1	5	5	4	4	5	1	2	4	3	3	1	1	2	2	4	38	0	1	1	1	1	1	1	1	1	1	1	1	1	1
1	32	3	2	1	1	1	1	3	1	5	5	4	4	5	1	2	4	3	3	1	1	2	2	4	38	1	1	1	1	1	1	1	1	1	1	1	1	1	1
1	31	2	2	1	2	1	1	3	4	4	4	2	3	4	3	2	5	4	3	2	1	3	3	5	37	1	1	1	1	1	1	1	1	1	1	1	1	1	1
1	31	2	2	1	2	1	1	3	4	4	4	2	3	4	3	2	5	4	3	2	1	3	3	5	37	1	1	1	1	1	1	1	1	1	1	1	1	1	1
1	31	2	1	2	2	1	1	3	4	4	4	2	3	4	3	2	5	4	3	2	1	3	3	5	37	1	1	1	1	1	1	1	1	1	1	1	1	1	1
2	30	2	3	1	1	1	1	4	3	3	4	3	4	4	5	4	5	3	1	1	1	2	2	4	49	1	1	1	1	1	1	1	1	1	1	1	1	1	1
1	28	2	4	1	2	1	1	3	2	2	4	3	3	3	2	2	2	3	2	4	5	3	3	5	35	1	1	0	1	1	1	1	1	1	1	1	1	1	1
1	28	2	1	2	2	1	1	3	2	2	4	3	3	3	2	2	2	3	2	4	5	3	3	5	35	0	0	0	1	1	1	1	1	1	1	1	1	1	1
1	28	2	1	4	2	1	1	3	2	2	4	3	3	3	2	2	2	3	2	4	5	3	3	5	35	0	1	1	1	1	1	1	1	1	1	1	1	1	1
2	30	2	3	4	1	1	1	4	3	3	4	3	4	4	5	4	5	3	1	1	1	2	2	4	38	1	1	1	1	1	1	1	1	1	1	1	1	1	1
2	30	2	1	6	1	1	1	4	3	3	4	3	4	4	5	4	5	3	1	1	1	2	2	4	38	1	1	1	1	1	1	1	1	1	1	1	1	1	1
2	30	2	1	4	1	1	1	4	3	4	4	2	3	4	5	3	4	1	4	1	1	3	3	5	36	1	1	0	1	1	1	1	1	1	1	1	1	1	1
2	30	2	3	6	1	1	1	4	3	4	4	2	3	4	5	3	4	1	4	1	1	3	3	5	36	1	1	1	1	1	1	1	1	1	1	1	1	1	1
2	30	2	1	6	1	1	1	4	3	4	4	2	3	4	5	3	4	1	4	1	1	3	3	5	34	0	0	1	0	0	0	0	1	1	1	1	1	1	1
1	25	2	1	4	3	1	1	4	1	3	2	2	4	3	2	3	4	3	2	3	3	4	2	5	49	1	1	1	1	1	1	1	1	1	1	1	1	1	1
1	43	2	3	6	1	1	1	3	2	3	2	3	3	3	2	2	2	4	3	3	3	4	4	3	43	1	1	1	1	1	1	1	1	1	1	1	1	1	1
1	34	3	4	6	2	1	1	4	3	3	4	4	4	4	4	3	1	3	2	2	1	2	2	5	45	1	1	1	1	1	1	1	1	1	1	1	1	1	1
1	34	2	1	2	1	1	1	3	2	3	2	3	3	3	2	2	2	4	3	3	3	4	4	3	49	1	1	1	1	1	1	1	1	1	1	1	1	1	1
2	30	2	1	6	1	1	1	4	3	5	4	4	4	4	5	1	1	1	2	1	1	3	3	5	49	1	1	1	1	1	1	1	1	1	1	1	1	1	1
1	35	3	3	6	1	1	1	3	4	4	3	3	3	3	3	3	3	5	2	1	1	3	3	4	34	0	1	1	1	1	0	0	1	1	1	1	1	1	1
1	35	3	3	1	1	1	1	3	4	4	3	3	3	3	3	3	3	5	2	1	1	3	3	4	34	1	1	1	0	1	1	1	1	1	1	1	1	1	1
1	35	3	1	1	1	1	1	3	4	4	3	3	3	3	3	3	3	5	2	1	1	3	3	4	34	1	1	1	0	1	1	1	1	1	1	1	1	1	1
2	30	3	2	5	2	1	1	2	3	3	3	4	4	3	1	2	2	4	3	3	1	4	4	5	33	0	0	1	0	0	0	0	1	1	1	1	1	1	1
2	30	3	1	1	2	1	1	2	3	3	3	4	4	3	1	2	2	4	3	3	1	4	4	5	33	0	1	1	1	1	0	0	1	1	1	1	1	1	1
2	30	3	1	4	2	1	1	2	3	3	3	4	4	3	1	2	2	4	3	3	1	4	4	5	33	0	0	1	0	0	0	0	1	1	1	1	1	1	1
1	28	2	2	4	1	1	1	3	2	3	2	3	3	3	2	2	2	4	3	3	3	4	4	3	33	0	1	1	1	1	0	0	1	1	1	1	1	1	1
1	28	2	4	2	1	1	1	3	2	3	2	3	3	3	2	2	2	4	3	3	3	4	4	3	33	0	0	1	0	0	0	0	1	1	1	1	1	1	1
1	26	2	1	3	2	1	1	4	4	3	3	3	3	4	3	4	4	4	3	1	1	2	4	3	36	0	0	1	1	1	1	1	1	1	1	1	1	1	1
1	26	2	4	5	2	1	1	4	4	3	3	3	3	4	3	4	4	4	3	1	1	2	4	3	36	0	0	0	1	1	1	1	1	1	1	1	1	1	1
1	26	2	2	1	2	1	1	4	4	3	3	3	3	4	3	4	4	4	3	1	1	2	4	3	36	1	1	0	1	1	1	1	1	1	1	1	1	1	1
1	29	3	4	1	2	1	1	4	3	3	4	4	4	4	4	3	1	3	2	2	1	2	2	5	35	1	1	0	1	1	1	1	1	1	1	1	1	1	1
1	29	3	1	3	2	1	1	4	3	3	4	4	4	4	4	3	1	3	2	2	1	2	2	5	35	0	0	1	1	1	1	1	1	1	1	1	1	1	1
1	25	2	2	6	3	1	1	4	1	3	2	2	4	3	2	3	4	3	2	3	3	4	2	5	34	0	1	1	1	1	0	0	1	1	1	1	1	1	1
1	25	2	2	4	3	1	1	4	1	3	2	2	4	3	2	3	4	3	2	3	3	4	2	5	31	1	1	1	0	1	1	1	1	1	1	1	1	1	1
1	29	3	3	5	1	1	1	4	2	5	5	1	3	5	4	1	1	4	3	1	1	2	2	4	34	1	1	1	0	1	1	1	1	1	1	1	1	1	1
1	29	3	2	1	1	1	1	4	2	5	5	1	3	5	4	1	1	4	3	1	1	2	2	4	34	0	0	1	0	0	0	0	1	1	1	1	1	1	1
1	29	3	2	4	1	1	1	4	2	5	5	1	3	5	4	1	1	4	3	1	1	2	2	4	34	0	1	1	1	1	0	0	1	1	1	1	1	1	1
2	30	2	1	4	1	1	1	4	3	5	4	4	4	4	5	1	1	1	2	1	1	3	3	5	34	1	1	1	0	1	1	1	1	1	1	1	1	1	1
2	30	2	2	6	1	1	1	4	3	5	4	4	4	4	5	1	1	1	2	1	1	3	3	5	33	1	1	1	0	1	1	1	1	1	1	1	1	1	1
1	28	2	4	6	1	1	1	3	2	3	2	3	3	3	2	2	2	4	3	3	3	4	4	3	33	0	0	1	0	0	0	0	1	1	1	1	1	1	1
1	28	2	4	3	1	1	1	3	2	3	2	3	3	3	2	2	2	4	3	3	3	4	4	3	33	1	1	1	0	1	1	1	1	1	1	1	1	1	1
1	29	3	1	2	1	1	1	5	5	4	4	3	3	4	4	1	2	3	2	1	1	4	4	5	32	0	0	1	0	0	0	0	1	1	1	1	1	1	1
1	29	3	2	3	1	1	1	5	5	4	4	3	3	4	4	1	2	3	2	1	1	4	4	5	32	1	1	1	0	1	1	1	1	1	1	1	1	1	1
1	29	3	1	6	1	1	1	5	5	4	4	3	3	4	4	1	2	3	2	1	1	4	4	5	32	1	1	1	0	1	1	1	1	1	1	1	1	1	1
1	29	3	4	1	1	1	1	5	5	4	4	3	3	4	4	1	2	3	2	1	1	4	4	5	32	0	1	1	1	1	0	0	1	1	1	1	1	1	1
1	29	3	4	2	1	1	1	5	5	4	4	3	3	4	4	1	2	3	2	1	1	4	4	5	32	1	1	1	0	1	1	1	1	1	1	1	1	1	1
1	29	3	1	3	1	1	1	5	5	4	4	3	3	4	4	1	2	3	2	1	1	4	4	5	32	0	1	1	1	1	0	0	1	1	1	1	1	1	1
1	29	3	1	1	1	1	1	5	5	4	4	3	3	4	4	1	2	3	2	1	1	4	4	5	32	0	1	1	1	1	0	0	1	1	1	1	1	1	1
1	29	3	1	5	1	1	1	5	5	4	4	3	3	4	4	1	2	3	2	1	1	4	4	5	32	0	0	1	0	0	0	0	1	1	1	1	1	1	1
1	29	3	2	1	1	1	1	5	5	4	4	3	3	4	4	1	2	3	2	1	1	4	4	5	32	0	0	1	0	0	0	0	1	1	1	1	1	1	1
1	30	3	1	6	1	1	1	3	1	3	3	2	3	2	3	2	3	3	3	3	1	3	3	4	31	0	1	1	1	1	0	0	1	1	1	1	1	1	1
1	30	3	1	1	1	1	1	3	1	3	3	2	3	2	3	2	3	3	3	3	1	3	3	4	31	0	0	1	0	0	0	0	1	1	1	1	1	1	1
1	30	3	1	3	1	1	1	3	1	3	3	2	3	2	3	2	3	3	3	3	1	3	3	4	31	0	1	1	1	1	0	0	1	1	1	1	1	1	1
1	30	3	1	1	1	1	1	5	2	4	4	2	3	4	2	3	4	3	2	2	1	1	1	4	34	0	0	1	0	0	0	0	1	1	1	1	1	1	1
1	30	3	1	2	1	1	1	5	2	4	4	2	3	4	2	3	4	3	2	2	1	1	1	4	34	0	1	1	1	1	0	0	1	1	1	1	1	1	1
1	30	3	2	2	1	1	1	5	2	4	4	2	3	4	2	3	4	3	2	2	1	1	1	4	34	0	1	1	1	1	0	0	1	1	1	1	1	1	1
1	35	3	2	6	1	1	1	5	4	3	5	2	5	3	2	2	2	3	2	2	1	2	2	4	32	1	1	1	0	1	1	1	1	1	1	1	1	1	1
1	35	3	1	4	1	1	1	5	4	3	5	2	5	3	2	2	2	3	2	2	1	2	2	4	32	0	1	1	1	1	0	0	1	1	1	1	1	1	1
1	35	3	1	6	1	1	1	5	4	3	5	2	5	3	2	2	2	3	2	2	1	2	2	4	31	0	1	1	1	1	0	0	1	1	1	1	1	1	1
1	38	3	4	6	1	1	1	4	2	3	3	2	3	3	2	1	3	3	4	2	1	2	2	4	30	0	1	1	1	1	0	0	1	1	1	1	1	1	1
1	38	3	1	4	1	1	1	4	2	3	3	2	3	3	2	1	3	3	4	2	1	2	2	4	30	1	1	1	0	1	1	1	1	1	1	1	1	1	1
1	28	3	2	1	1	1	1	4	2	3	3	2	3	3	2	1	3	3	4	2	1	2	2	4	30	0	0	1	0	0	0	0	1	1	1	1	1	1	1
1	37	2	1	3	1	1	1	5	5	4	3	3	4	4	2	4	3	1	3	1	1	2	2	5	45	1	1	1	1	1	1	1	1	1	1	1	1	1	1
1	37	2	1	1	1	1	1	5	5	4	3	3	4	4	2	4	3	1	3	1	1	2	2	5	33	1	1	1	0	1	1	1	1	1	1	1	1	1	1
1	37	2	1	4	1	1	1	5	5	4	3	3	4	4	2	4	3	1	3	1	1	2	2	5	33	0	1	1	1	1	0	0	1	1	1	1	1	1	1
1	27	2	1	5	1	1	1	5	5	1	5	5	5	1	2	5	1	2	1	1	1	3	3	5	30	1	1	1	0	1	1	1	1	1	1	1	1	1	1
1	27	2	1	1	1	1	1	5	5	1	5	5	5	1	2	5	1	2	1	1	1	3	3	5	30	0	0	1	0	0	0	0	1	1	1	1	1	1	1
1	27	2	2	6	1	1	1	5	5	1	5	5	5	1	2	5	1	2	1	1	1	3	3	5	30	0	1	1	1	1	0	0	1	1	1	1	1	1	1
1	35	3	3	3	1	1	1	3	2	3	3	2	2	4	1	1	4	3	4	1	1	2	2	4	29	0	0	1	0	0	0	0	1	1	1	1	1	1	1
1	35	3	3	4	1	1	1	3	2	3	3	2	2	4	1	1	4	3	4	1	1	2	2	4	29	1	1	1	0	1	1	1	1	1	1	1	1	1	1
1	28	3	2	6	1	1	1	3	2	3	3	2	2	4	1	1	4	3	4	1	1	2	2	4	29	0	0	1	0	0	0	0	1	1	1	1	1	1	1
1	30	3	2	5	1	1	1	3	2	3	3	2	3	2	2	1	4	2	2	1	1	3	4	4	26	1	1	1	0	1	1	1	1	1	1	1	1	1	1
1	30	3	3	6	1	1	1	3	2	3	3	2	3	2	2	1	4	2	2	1	1	3	4	4	26	0	1	1	1	1	0	0	1	1	1	1	1	1	1
1	24	2	1	6	1	1	1	3	5	2	3	3	4	4	2	1	2	1	2	2	2	3	3	4	34	0	0	1	0	0	0	0	1	1	1	1	1	1	1
1	24	2	3	4	1	1	1	3	5	2	3	3	4	4	2	1	2	1	2	2	2	3	3	4	28	0	1	1	1	1	0	0	1	1	1	1	1	1	1
1	24	2	2	6	1	1	1	3	5	2	3	3	4	4	2	1	2	1	2	2	2	3	3	4	28	0	0	1	0	0	0	0	1	1	1	1	1	1	1
1	30	3	4	2	1	1	1	3	2	3	3	2	3	2	2	1	4	2	2	1	1	3	4	4	47	0	1	1	1	1	1	1	1	1	1	1	1	1	1
1	25	2	1	2	1	1	1	3	2	1	2	2	2	1	1	3	5	3	2	1	1	2	1	4	45	1	1	1	1	1	1	1	1	1	1	1	1	1	1
1	25	2	3	1	1	1	1	3	2	1	2	2	2	1	1	3	5	3	2	1	1	2	1	4	24	0	0	1	0	0	0	0	1	1	1	1	1	1	1
1	25	2	2	4	1	1	1	3	2	1	2	2	2	1	1	3	5	3	2	1	1	2	1	4	24	1	1	1	0	1	1	1	1	1	1	1	1	1	1
1	40	3	2	5	2	1	1	2	1	1	2	4	2	1	2	2	2	1	1	1	1	2	2	2	45	1	1	1	1	1	1	1	1	1	1	1	1	1	1
1	40	3	2	6	2	1	1	2	1	1	2	4	2	1	2	2	2	1	1	1	1	2	2	2	20	0	1	1	1	1	0	0	1	1	1	1	1	1	1
1	40	3	3	1	2	1	1	2	1	1	2	4	2	1	2	2	2	1	1	1	1	2	2	2	20	0	0	1	0	0	0	0	1	1	1	1	1	1	1
